# Supplementary material
Source: PubMed Central journal article supplement (PMC6013380)
Supplement: NIHMS961196-supplement-Supplemental_Methods_and_Figures.pdf [file NIHMS961196-supplement-Supplemental_Methods_and_Figures.pdf]

Pm3 Vma22q-Zdk2 DNA sequence

ATAGCCTCAAAATGTTTCTACTCCTTCTTTACTCTTCCAGATTTTCCCGGACTCCGCGTATCGCCG  
TACCACTTCAAACACCCAAGCACAGCATACTAAATTTCCCCTCTTCTTCCTCTAGGGTGTCGT  
TAATTACCCGTAATAAGGTTTGGAAAGAGGAAAAAGAGACCGCCTCGTTTCTCTCTCTTCGTCCG  
AAAAGGCAATAAAAATTCTTACCACGCTCCTTTTCTTGAAATTTTTTTTTTTAATTTTTTCT  
CTCCGATGACCTCCCATTGATATTTAGGTTAATAAACGGCCTTTAATTCCTCAAGTTTCAGTTT  
CATTTTTCTTGTTCTATTACAACCTTTTTTACTTCTTGCTCATCAGGAAGAAAGCATAGCAATCT  
AATCTAAGTTTAAATTAATAACAAAATGGCTGTTGACGTTCCAAGAGCTGTTATCAACAAGTTGA  
TGTTGTTCACTGCTGCTATGGTTGTTTTGCCAGTTTTGACTTTCTTCATCATCCAACAATTCACT  
CCAAACACTTTGATCTCTGGTGGTTTGGCTGCTGCTATGGCTAACGTTGTTTTGATCGTTTACAT  
CGTTGTTGCTTTCAGAGAAGACACTGAAGACCACAAGGTTGACGGTAACCAACAAGAAGACGCT  
AGCGCTGGTGGTGGTGGTGGAGCTGGTGCAAGTGATAACAAATTCAATAAAGAAATGTTGAGTG  
CCCGTGTGGAAATCTATGGTCTGCCAAACCTGAATTGGGGTCAGAGGTTTGCCTTCATCAGTAGC  
CTGACGGATGATCCATCTCAGAGCGCCAATCTGCTGGCCGAAGCCAAAAAACTGAACGATGCCCA  
GGCCCCAAAATAA

Pm7 DNA sequence

ATAGCTTCAAAATGTCTCTACTCCTTTTTTACTCTTCCAGATTTTCTCGGACTCCGCGCACCGCCG  
TACCACTTCAAACACCCAAGCACAGCATACTAAATTTCCCCTCCTCCTTCTCTAGGGTGCCGTT  
AATTACCCGTAATAAGGTTTGGAAAAGGAAAAAGAGACCGCCTCGTCCCTTTTTCTTCGTCCGA  
GAAGGCAATAAAAATTTTTATCACGTTTCTTCTCTTGAACCTTTTTTTTTCGATTTTGTTCTCT  
TTCGACGACCTCCCATTGATATTTGAGTTAACAACGGTCTTCAATTTCTCAAGTTTCAGTTTCA  
TTTTCTCTGTTCTATTACAACCTTTTTTACTTCTTGCTCATTGGAAAGAAAGCATAGCAATCTAA  
TCTAAGTTT

Pm2 DNA sequence

ATAGCTCTAAAGTGCTTCGGCTCCCCCTTACTCCTCCAGGTTTTCTCAGACTCCGCGCATCGCCG  
TACCACCTCAAAGCCCCAAGCGCAGCATAACCAATCTCCCCTCTTCTTCTCTAGGGTGTCACT  
AGTTACTCGTACTAAGGGTTTGGGGAAGGAGAAAGAGACCGCCTCGTCTTCTTTCTTCGTCCGA  
GGGGGCAATAGAAGTTTTTATCATGTCTCCTTTCCTTGAGAACCTTTTCTTCGATCTTGTTCTCT  
TTCGACGGCCTCCCGTTGGTATTTAGGTTAATGAACGGTCTTCAACCTCTCAAGTTTCAGTTTCC  
TTTCTCCCGTCTATTACGACCCTTCTACTTCTCACTCAGTAGAACGGGAGCATAGCAATCTAA  
TCTAAGTTT

Vma22q-Zdk2 protein sequence

MAVDVPRAVINKLMLFTAAMVVLPLVTFHIIQQFTPNTLISGGLAAAMANVVLIVYIVVAFREDTE  
DHKVDGNQQEDASAGAGAGAGAVDNKFNKEMLSARVEIYGLPNLNWQRFAFISLTDPSQSA  
NLLAEAKKLNDAPK

LexA-Venus-LANS4 DNA sequence

ATGAAAGCGTTAACGGCCAGGCAACAAGAGGTGTTTGATCTCATCCATGATCACATCAGCCAGAC  
AGGTATGCCGCCGACGCGTGCGGAAATCGCGCAGCGTTTGGGGTCCCGTCCCCAAACGCGGCTG  
AAGAACATCTGAAGGCGCTGGCACGCAAAGGCGTTATTGAAATTGTTCCGGCGCATCACGCGGG  
ATTCGTCTGTTGCAGGAAGAGGAAGAAGGGTTGCCGCTGGTAGGTCGTGTGGCTGCCGGTGAACC  
ACTTCTGGCGCAACAGCATATTGAAGGTCATTATCAGGTCGATCCTTCTTATTCAAGCCGAATG  
CTGATTTCTGCTGCGCGTCAGCGGGATGTCGATGAAAGATATCGGCATTATGGATGGTGACTTG  
CTGGCAGTGCATAAACTCAGGATGTACGTAACGGTCAGGTCGTTGTCGCACGTATTGATGACGA  
GGTTACCGTTAAGGGCTGGAAAAACAGGGCAATAAAGTCGAACTGTTGCCAGAAAATAGCGAG  
TTTAAACCAATTGTCGTAGATCTTCGTCAGCAGAGCTTACCATTGAAGGGCTGGCGGTGGGGT  
TATTCGCAACGGCGACTGGCTGGAATTGTCTAGAGTGAGCAAGGGCGAGGAGCTGTTACCCGGG  
GTGGTGCCCATCCTGGTTCGAGCTGGACGGCGACGTAACGGCCACAAGTTCAGCGTGTCCGGCGA  
GGGCGAGGGCGATGCCACCTACGGCAAGCTGACCCTGAAGTTGATCTGCACCACCGGCAAGCTGC  
CCGTGCCCTGGCCCACCCTCGTGACCACCCTCGGCTACGGCCTGCAGTGCTTCGCCCCTACCCCG  
ACCACATGAAGCAGCAGCACTTCTTCAAGTCCGCCATGCCCGAAGGCTACGTCCAGGAGCGCACC  
ATCTTCTTCAAGGACGACGGCAACTACAAGACCCGCGCCGAGGTGAAGTTCGAGGGCGACACCCT  
GGTGAACCGCATCGAGCTGAAGGGCATCGACTTCAAGGAGGACGGCAACATCCTGGGGCACAAGC  
TGGAGTACAACACTACAACAGCCACAACGTCTATATCACCGCCGACAAGCAGAAGAACGGCATCAAG  
GCAAACCTCAAGATCCGCCACAACATCGAGGACGGCGGCGTGCAGCTCGCCGACCACTACCAGCA  
GAACACCCCATCGGCGACGGCCCCGTGCTGCTGCCCGACAACCACTACCTGAGCTACCAGTCCAA  
ACTGAGCAAAGACCCCAACGAGAAGCGCGATCACATGGTCCTGCTGGAGTTCGTGACCGCCGCCG  
GGATCACTCTCGGCATGGACGAGCTGTACAAGTTGCGGCCGCGGGGGAGCGGGGGCATTGATCTG  
AGCGGCCTGACCCTGCAGGGTTCTGGAAGTGGGTCGTTGGCTACTACACTTGAACGTATTGAGAA  
GAACTTTGTCATTACTGACCCAAGATTGCCAGATAATCCATTATATTCGCGTCCGATAGTTTCT  
TGCAGTTGACAGAATATAGCCGTGAAGAAATTTTGGGAAGAACTGCAGGTTTCTACAAGGTCC  
TGAAACTGATCGCGCGACAGTGAGAAAAATTAGAGATGCCATAGATAACCAAACAGAGGTCCT  
GTTGAGCTGATTAATTATACAAAGAGTGGTAAAAAGTTCTGGAACCTCTTCACTTGCAGCCTAT  
GCGAGATCAGAAGGGAGATGTCCAGTACTTTATTGGGGTTCAGTTGGATGGAACCTGAGCATGTC  
CGAGATGCTGCCGAGAGAGAGGGAGTCATGCTGATTAAGAAAACCTGCAGAAAATATTGATATGG  
CGGCAAAAAGAGTCAAACCTGGATTAA

LexA-Venus-LANS4 protein sequence

MKALTARQQEVFDLIHDHISQTGMPPTRAEIAQRLGFRSPNAAEEHLKALARKGVIEIVSGASRGI  
RLLQEEEEGLPLVGRVAAGEPLLAQQHIEGHYQVDPFLKPNADFLLRVSGMSMKDIGIMDGDLL  
AVHKTQDVRNGQVVVARIDDEVTVKGLEKQGNKVELLPENSEFKPIVVDLRQQSFTIEGLAVGVIR  
NGDWLELSRVSKGEELFTGVVPILVELDGDVNGHKFSVSGEGDATYGKLTCLKICTTGKLPVP  
WPTLVTTLG YGLQCFARYPDHMKQHDFFKSAMPEGYVQERTIFFKDDGNYKTRAEVKFEGDTLV  
NRIELKGIDFKEDGNILGHKLEYNYNSHNVYITADKQKNGIKANFKIRHNIEDGGVQLADHYQQNT  
PIGDGPVLLPDNHLYSYQSKLSKDPNEKRDMVLEFVTAAGITLGMDELYKLRPRGSGGIDLSGL

TLQGSGSGSLATTLERIEKNFVITDPRLPDNPIIFASDSFLQLTEYSREEILGRNCRFLQGPETDRAT  
VRKIRDAIDNQTEVTVQLINYTKSGKKFWNLFHLQPMRDQKGDVQYFIGVQLDGTEHVRDAAER  
EGVMLIKKTAENIDMAAKRVKLD
